# Supplementary material for: Glycine-assisted phosphorus release and recovery from waste-activated sludge
Source: Royal Society of Chemistry journal article supplement (doi:10.1039/d4ew00158c), 2024-01-01
Supplement: d4ew00158c1.pdf [file d4ew00158c1.pdf]

**Table S1.** Comparison, advantages and disadvantages of different phosphorus recovery methods from waste activated sludge.

| Method                 | Phosphorus release/recovery (%) | Product | Advantages/disadvantages                    | Reference                                              |                                                 |
|------------------------|---------------------------------|---------|---------------------------------------------|--------------------------------------------------------|-------------------------------------------------|
| Wet chemical treatment | NaOH/KOH                        | 36~46   | Struvite                                    | • High efficiency on P recovery;<br>• Simple operation | (Bi et al., 2014)<br>(NocheFranca et al., 2020) |
|                        | HCl                             | 38      | -                                           | • Metal dissolution;                                   | (He et al., 2017)                               |
|                        | H <sub>2</sub> SO <sub>4</sub>  | 25      | Iron phosphate;<br>Calcium phosphate        | • High chemical dosage;                                | (Quist-Jensen et al., 2018)                     |
|                        | EDTA                            | 36      | Struvite                                    | • Pipeline corrosion and clogging;                     | (Hu et al., 2023)                               |
| Physical treatment     | Freeze-microwave                | 45      | Struvite                                    | • Wide range of applications                           | (Chang et al., 2019)                            |
|                        | Ultrasound                      | 49      | -                                           | • High operating costs and energy consumption;         | (Lin et al., 2020)                              |
|                        | Ozonation                       | 86      | Hydroxyapatite /Amorphous calcium phosphate | • Requires power;                                      | (Vasenko et al., 2020)                          |
| Biological treatment   | Bioleaching                     | 52      | -                                           | • Longer reaction time;                                | (Lee et al., 2020)                              |
|                        | Digestion                       | 90      | Struvite                                    | • Accompanied metal solubilization;                    | (Alhraishawi et al., 2024)                      |
|                        | Carbon uptake (Acetate)         | 56      | Calcium phosphate                           | • Carbon/chemical cost                                 | (Anders et al., 2021)                           |



**Fig. S1.** P extraction performance in batch tests under different treatment of P (a) and TOC (b) profiles at a MLSS concentration of 5.0 g/L. The tests were conducted in 30°C, 180 rpm within an incubator.

## Reference

1. Bi W, Li Y, Hu Y. Recovery of phosphorus and nitrogen from alkaline hydrolysis supernatant of excess sludge by magnesium ammonium phosphate. *Bioresource Technology*. 2014;166:1–8.
2. Nochefranca CKL, Oyson ZKC, Pedro ABS, Pausta CM, Damalerio R, Promentilla MB, et al. Phosphorus recovery from septage treatment plant sludge by struvite formation with alkaline hydrolysis as pre-treatment. *IOP Conf Ser: Mater Sci Eng*. 2020;778(1):012141.
3. He ZW, Tang CC, Wang L, Guo ZC, Zhou AJ, Sun D, et al. Transformation and release of phosphorus from waste activated sludge upon combined acid/alkaline treatment. *RSC Adv*. 2017;7(56):35340–5.
4. Quist-Jensen CA, Wybrandt L, Løkkegaard H, Antonsen SB, Jensen HC, Nielsen AH, et al. Acidification and recovery of phosphorus from digested and non-digested sludge. *Water Research*. 2018;146:307–17.
5. Hu D, Zhang C, Zhang Y. Comparison of different pretreatment methods on phosphorus release and recovery as struvite from excess sludge. *Environmental Technology*. 2023;44(2):161–9.
6. Chang X, Zeng W, Li N, Li S, Peng Y. Phosphorus recovery from freeze-microwave pretreated sludge supernatant by phosphate sedimentation. *Environ Sci Pollut Res*. 2019;26(13):12859–66.
7. Lin X, Lan L, Altaf R, Han Z, Ye Z, Zhu S, et al. Simultaneous P release and recovery from fish farm sludge using a Zr-modified magnetic adsorbent treated by ultrasound. *Journal of Cleaner Production*. 2020;250:119529.
8. Vasenko L, Bonnemain-Fernandes A, Malwade C, Qu H. Phosphorus recovery from municipal wastewater via a two-step process of ozonation and crystallization: process development, optimization and upscaling. *Environ Sci: Water Res Technol*. 2020;6(3):817–28.
9. Lee Y, Sethurajan M, van de Vossenberg J, Meers E, van Hullebusch ED. Recovery of phosphorus from municipal wastewater treatment sludge through bioleaching using *Acidithiobacillus thiooxidans*. *Journal of Environmental Management*. 2020;270:110818.
10. Alhraishawi A, Aslan S, Ozturk M. Methane Production and Nutrient Recovery After Applying Microwave Technology in Sewage Sludge Pretreatment. *Int J Environ Res*. 2024;18(3):35.
11. Anders A, Weigand H, Cakir H, Kornhaas U, Platen H. Phosphorus recycling from activated sludge of full-scale wastewater treatment plants by fast inversion of the biological phosphorus elimination mechanism. *Journal of Environmental Chemical Engineering*. 2021;9(6):106403.
